# Supplementary material
Source: Springer Nature journal article supplement (https://www.springermedizin.de/resource/supplementary/12887_2009_276_MOESM1_ESM.pdf/9477674)
Supplement: MOESM1 [file 9477674]

| body weight | AZT BD |                                | 3TC BD     |                  | NVP OD (first two 2 weeks only) |                  | NVP BD     |         | Price/mth.  |
|-------------|--------|--------------------------------|------------|------------------|---------------------------------|------------------|------------|---------|-------------|
|             | (kg)   | 300mg tabl<br>syrup<br>10mg/ml | 150mg tabl | syrup10mg<br>/ml | 200mg tabl                      | syrup<br>10mg/ml | 200mg tabl | 10mg/ml | (MK)        |
| 3- <4       |        | 4                              |            | 1,5              |                                 | 3                |            | 5       | <b>1385</b> |
| 4- <6       |        | 6                              |            | 2,5              |                                 | 4                |            | 6,5     | <b>1971</b> |
| 6- <8       | 1/4    |                                |            | 3                |                                 | 5                |            | 8       | <b>1938</b> |
| 8- <10      | 1/4    |                                |            | 4                |                                 | 6                |            | 9       | <b>2220</b> |
| 10- <12     | 1/4    | 2                              |            | 5                |                                 | 7                | 1/2        |         | <b>2226</b> |
| 12- <14     | 1/4    | 4                              |            | 6                |                                 | 8                | 1/2        | 2       | <b>2883</b> |
| 14- <16     | 1/4    | 5                              |            | 7                |                                 | 9                | 1/2        | 3       | <b>3282</b> |
| 16- <20     | 1/2    |                                | 1/2        |                  | 1/2                             |                  | 1/2        | 5       | <b>3005</b> |
| 20- <24     | 1/2    | 2                              | 1/2        | 2                | 1/2                             |                  | 1/2        | 7       | <b>3803</b> |
| 24- <28     | 1/2    | 3                              | 1/2        | 4                | 1/2                             |                  | 1          |         | <b>4115</b> |
| 28- <30     | 1/2    | 4                              | 1/2        | 5                | 1/2                             |                  | 1          |         | <b>4373</b> |
